# Supplementary material for: Cloud droplet size distribution broadening during diffusional growth: ripening amplified by deactivation and reactivation
Source: Copernicus journal article supplement (doi:10.5194/acp-2017-1125), 2017-12-06
Supplement: Supplementary file [file acp-2017-1125-AC3-supplement.pdf]

# Cloud droplet size distribution broadening during diffusional growth: ripening amplified by deactivation and reactivation

Fan Yang<sup>1</sup>, Pavlos Kollias<sup>1,2</sup>, Raymond A. Shaw<sup>3</sup>, and Andrew M. Vogelmann<sup>1</sup>

<sup>1</sup>Brookhaven National Laboratory, Upton, New York, USA.

<sup>2</sup>Stony Brook University, Stony Brook, New York, USA.

<sup>3</sup>Michigan Technological University, Houghton, Michigan, USA.

*Correspondence to:* Fan Yang (fanyang@bnl.gov)

**Abstract.** Cloud droplet size distributions (CSDs), which are related to cloud albedo and lifetime, are usually broader in warm clouds than predicted from adiabatic parcel calculations. We investigate a mechanism for the CSD broadening using a ~~Lagrangian bin-microphysics~~ **moving-bin** cloud parcel model that considers the condensational growth of cloud droplets formed on polydisperse, sub-micrometer aerosols in an adiabatic cloud parcel that undergoes vertical oscillations, such as those due to cloud circulations or turbulence. Results show that the CSD can be broadened during condensational growth as a result of Ostwald ripening amplified by droplet deactivation and reactivation, **which is consistent with early work.**, ~~which is consistent with Korolev (1995).~~ The relative roles of the solute effect, curvature effect, deactivation and reactivation on CSD broadening are investigated. Deactivation of smaller cloud droplets, which is due to the combination of curvature and solute effects in the downdraft region, enhances the growth of larger cloud droplets and thus contributes particles to the larger size end of the CSD. Droplet reactivation, which occurs in the updraft region, contributes particles to the smaller size end of the CSD. In addition, we find that growth of the largest cloud droplets strongly depends on the residence time of cloud droplet in the cloud rather than the magnitude of local variability in the supersaturation fluctuation. This is because the environmental saturation ratio is strongly buffered by smaller cloud droplets. Two necessary conditions for this CSD broadening, which generally occur in the atmosphere, are: (1) droplets form on polydisperse aerosols of varying hygroscopicity and (2) the cloud parcel experiences upwards and downwards motions. Therefore we expect that this mechanism for CSD broadening is possible in real clouds. Our results also suggest it is important to consider both curvature and solute effects before and after cloud droplet activation in a cloud model. The importance of this mechanism compared with other mechanisms on cloud properties should be investigated through in-situ measurements and 3-D dynamic models.

## 1 Introduction

Warm clouds play a crucial role in water cycle and energy balance on Earth (Boucher et al., 2013) so understanding the whole life cycle of warm ~~cloud~~ **clouds**, including formation, development and precipitation, is important for better prediction of local weather and global climate. Cloud droplet growth is dominated by diffusion of water vapor at the early stage of cloud development, while collisional growth is ~~believed~~ **considered** to be the most important mechanism for drizzle formation and warm cloud precipitation (Pruppacher and Klett, 2010). The concept of a cloud parcel rising adiabatically in the atmosphere

has been used to study cloud microphysical properties for decades. ~~Imaging~~ **Imagining** an initially sub-saturated air parcel rising adiabatically, cloud forms at the lifting condensation level and the growth of cloud droplets due to diffusional growth can be accurately predicted if we know the aerosol chemical composition. Because the linear growth rate of a cloud droplet is inversely proportional to droplet size, diffusional growth is inefficient when the droplet diameter is larger than  $20\ \mu\text{m}$  while collisional growth is efficient when the droplet diameter is larger than  $38\ \mu\text{m}$  (Hocking, 1959). **On the other hand, collisional growth is efficient when the droplet diameter is larger than  $38\ \mu\text{m}$  (Pruppacher and Klett, 2010).** ~~In addition~~ **Meanwhile,** the sizes of the smaller cloud droplets will approach those of the larger droplets and narrow the cloud droplet size distribution (CDS), which is also unfavorable for collisional growth (Howell, 1949; Mordy, 1959). If only diffusional growth is considered, **the CDS becomes narrower and** several tens of minutes even up to hours will be needed for a cloud droplet to reach efficient-collision size in an ascending cloud parcel, ~~which is much longer than the timescale typically observed.~~ **However,** the CDS in a real cloud is usually wider than predicted by an adiabatic cloud parcel model and drizzle-size cloud droplets are frequently observed in warm clouds (e.g., Laird et al., 2000; Glienke et al., 2017; Siebert and Shaw, 2017).

The broadening of the CDS has a strong effect on precipitation and radiation. A broader CDS implies larger differences in the terminal velocity of droplets. This is beneficial for collision coalescence and might cause the fast-rain process in the atmosphere (e.g., Göke et al., 2007). In addition, a broader CDS increases the relative dispersion, which is the ratio of standard deviation to the mean CDS. Previous studies show that an increase in relative dispersion is relevant to the albedo effect and increases albedo susceptibility (Feingold et al., 1997; Liu and Daum, 2002; Feingold and Siebert, 2009). An interesting question is why the CDS is wider than predicted; in particular, why large droplet sizes are frequently observed in the clouds (e.g., Siebert and Shaw, 2017). Several mechanisms have been proposed that can be divided into two categories: turbulence-induced spectra broadening and aerosol-induced spectra broadening. A brief review is given next for each category.

Turbulence is ubiquitous in the clouds and can cause CDS broadening in both condensation and collision processes (e.g., Shaw, 2003; Devenish et al., 2012). Turbulence induces vertical oscillations of air parcels and causes fluctuations in temperature, water vapor concentration, and supersaturation (e.g., Ditas et al., 2012; Hammer et al., 2015). The effects of supersaturation fluctuations on droplet condensational growth in turbulent environments have been studied for several decades (e.g., Cooper, 1989; Khvorostyanov and Curry, 1999). A qualitative description of this mechanism is that some “lucky” cloud droplets experience relatively larger supersaturation or stay a relatively longer time in the cloud compared with the other cloud droplets; therefore they can grow larger in size and broaden the CDS. Recent theoretical and experimental studies support this mechanism and provide ways to quantify the resulting width of the droplet size distribution (e.g., McGraw and Liu, 2006; Sardina et al., 2015; Chandrakar et al., 2016; Grabowski and Abade, 2017; Siewert et al., 2017). Turbulence can also modulate the condensational growth of cloud droplets through mixing and entrainment (e.g., Lasher-Trapp et al., 2005; Cooper et al., 2013; Korolev et al., 2013; Yang et al., 2016). In addition, turbulence can enhance the collision efficiency between droplets and produce “lucky” cloud droplets through stochas-

tic collisions, which has been confirmed by direct numerical simulations and Lagrangian drop models (e.g., Paluch, 1970; Kostinski and Shaw, 2005; Falkovich and Pumir, 2007; Grabowski and Wang, 2013; Naumann and Seifert, 2015; de Lozar and Muessle, 2016).

5      Aerosols, which serve as condensation nuclei of cloud droplets, can also cause CDSB broadening in turbulent environments through several mechanisms. First, turbulence-induced mixing and entrainment can trigger in-cloud activation of haze particles, which can broaden the left branch of size distribution (e.g., Khain et al., 2000; Devenish et al., 2012; Yang et al., 2016; Grabowski et al., 2018). Secondly, giant cloud condensational nuclei (GCCN, usually defined as aerosols with dry diameter larger than a few  $\mu\text{m}$ ) provides an embryo for large droplets, which can broaden the  
10 right branch of size distribution (e.g., Feingold et al., 1999; Yin et al., 2000; Jensen and Lee, 2008; Cheng et al., 2009). Recently, Jensen and Nugent (2017) investigated the effect of GCCN on droplet growth and rain formation using a cloud parcel model. They found that GCCN provides an embryo for big droplets at the activation stage and, more importantly, GCCN enhances droplet growth after activation due to the solute effect. For example, droplets formed on GCCN can still grow through the condensation of water vapor in the downdraft region even though the environment is  
15 subsaturated with respect to pure water (Jensen and Nugent, 2017). This, in fact, is an extreme case of Ostwald ripening.

Ostwald ripening for cloud droplets is the phenomenon when larger droplets grow and smaller droplets shrink due to curvature and/or solute effects and, thus, it can broaden the CDSB at both small and large sides of the distribution. Srivastava (1991) investigated the growth of cloud droplets in a rising air parcel. Results show that the variance of squared  
20 radius of the CDSB was constant during the condensational growth process if both curvature and solute effects were ignored, but it was increased if those effects were considered. This “condensational broadening” is more pronounced in clouds with high cloud droplet number concentration and low vertical velocity. In turbulent clouds, droplets will experience supersaturated/subsaturated conditions in updraft/downdraft regions. Korolev (1995) studied the evolution of the CDSB driven by supersaturation fluctuations in a vertically oscillating air parcel. Supersaturation fluctuations  
25 in his study mean that air is supersaturated in the updraft and subsaturated in the downdraft; however no spatial inhomogeneity of supersaturation is considered in the parcel. Results show that the growth and evaporation cycles during the CDSB evolution are irreversible if the solute and curvature effects are considered. This “CDSB irreversibility” (terminology used in his paper) will promote the growth of large cloud droplets, lead to evaporation or even deactivation of small cloud droplets, and thus broaden the CDSB. Korolev (1995) argued that stronger turbulent fluctuations of  
30 supersaturation would result in a broader CDSB. This is contrary to Çelik and Marwitz (1999), who found that supersaturation fluctuations are not responsible for CDSB broadening and the formation of large droplets. The curvature and solute effects on Ostwald ripening, activation and deactivation have been the topics of study in recent years (e.g., Wood et al., 2002; Arabas and Shima, 2017; Chen et al., 2018; Sardina et al., 2018) but, to our knowledge, the relative roles of the curvature effect and solute effect on CDSB broadening have not been investigated.

35

Here we consider an adiabatic cloud parcel that experiences vertical oscillations, with cloud droplets that are formed on polydisperse, sub-micrometer aerosols. Results show that the CDSB is broadened during diffusional growth due to Ostwald ripening and associated droplet deactivation and reactivation, which is consistent with previous studies (e.g., Korolev, 1995; Çelik and Marwitz, 1999). In this study, we investigate (1) what are the relative roles of the solute and curvature effects on CDSB broadening, and (2) what other factors can affect this broadening? This paper is organized as follows. Section 2 introduces the basic setup for cloud parcel model, which is similar to Jensen and Nugent (2017) except that there are no GCCN. Results related to CDSB broadening and the associated sensitivities **sensitivity** studies are detailed in Section 3. Conclusions are summarized in Section 4, including a discussion of implications in cloud observations and modeling.

## 10 2 Methods

**Historically there are two types of bin microphysics: fixed-bin scheme and moving-bin scheme (see section 4.2.1 in Khain et al. (2015) and references therein). The advantage of the moving-bin method (i.e., Lagrangian bin-microphysics) is that it can avoid artificial CDSB broadening. In this study, we use a cloud parcel model with moving-bin microphysics. The original version of the model was designed to study cirrus clouds by Heymsfield and Sabin (1989), and then the warm clouds (Feingold and Heymsfield, 1992; Feingold et al., 1998). In recent years, this model has been modified and applied to investigate various of microphysical problems (e.g., Feingold and Kreidenweis, 2000; Xue and Feingold, 2004; Ervens and Feingold, 2012; Yang et al., 2012; Li et al., 2013; Yang et al., 2016). In the current version of parcel model, air pressure ( $p$ ), parcel height ( $h$ ), air temperature ( $T$ ), water vapor mixing ratio ( $q_v$ ), and radii of haze and cloud droplets ( $r_i$ ) are prognostic variables, which are calculated using the variable-coefficient ordinary differential equation solver (VODE) (Brown et al., 1989). Specifically,  $p$  is calculated from hydrostatic equation and  $h$  depends on the vertical velocity ( $w$ ). Similar to Eq. 11 in Heymsfield and Sabin (1989),  $T$  is calculated from,**

$$\frac{dT}{dt} = -\frac{g}{c_{p,air}} w + \frac{l_v}{c_{p,air}} \frac{dq_w}{dt}, \quad (1)$$

**where  $g$  is the gravitational acceleration,  $c_{p,air}$  is the heat capacity of air,  $l_v$  is the latent heat of water vaporization, and  $q_w$  is the liquid water mixing ratio. The first term in Eq. 1 is the cooling due to dry adiabatic ascent, and the second term is the microphysical contribution due to the release of latent heat of condensation. Because the total water mixing ratio is conserved in the parcel, a decrease in water vapor mixing ratio ( $-dq_v$ ) equals an increase in liquid water mixing ratio ( $dq_w$ ). Air supersaturation ( $S_e$ ), which controls the growth of haze and cloud droplets, is calculated from  $T$ ,  $p$  and  $q_v$ . A brief introduction of the model setup and the main mathematical formulations used for cloud microphysical processes are described below.**

30

In this study, the parcel starts rising at about 300  $m$  below cloud base and starts descending at about 300  $m$  above cloud base, which is similar to Jensen and Nugent (2017), except that our cloud parcel then experiences upward and downward oscillations

between 50 *m* above cloud base and 300 *m* above cloud base (see Figure 1a). The ascending and descending velocities are set to be 0.5 *m s*<sup>-1</sup> and -0.5 *m s*<sup>-1</sup> for the control case. At the parcel's initial altitude of 600 *m*, the initial air temperature is 284.3 *K*, pressure is 938.5 *hPa*, and saturation ratio is 0.856, which are as same as Jensen and Nugent (2017).

- 5 The initial dry aerosols are ammonium sulfate with a log-normal size distribution range of 10 *nm* to 500 *nm* in radius (no GCCN). The sub-micrometer aerosols are parsed into 100 bins, ~~where the~~ The median radius is 50 *nm* ~~with~~ **and** the geometric standard deviation ~~is~~ 1.4. The total number mixing ratio is 1000 *mg*<sup>-1</sup> for the control case, which is about 1000 *cm*<sup>-3</sup> (see Figure 1b). The model first calculates the equilibrium size of haze droplets for each bin at 85.6% relative humidity, as does Jensen and Nugent (2017). **The equilibrium size of haze particles for the *i*th bin (*r<sub>i</sub>*) at initial relative**
- 10 **humidity is obtained by solving the equation  $S_{sat}(r_i) = RH(t = 0)$  iteratively, where  $S_{sat}$  is the saturation ratio for a solution droplet, calculated from Köhler equation (Pruppacher and Klett, 2010, p. 172),**

$$S_{sat} \equiv \frac{e}{e_s(T)} = a_s(r_{d,i}, r_i) \exp\left(\frac{2\sigma_s}{\rho_w R_v T r_i}\right), \quad (2)$$

- where *e* is the water vapor pressure in air, *e<sub>s</sub>* is the saturated water vapor pressure over a solution droplet at *T*, *ρ<sub>w</sub>* is the density of water, and *R<sub>v</sub>* is the gas constant for water vapor. *σ<sub>s</sub>* is the water activity of the haze droplets, which is a
- 15 function of temperature and solute (Pruppacher and Klett, 2010, p. 133). *a<sub>s</sub>* is the water activity of haze droplets, which depends on the composition of aerosol, size of dry aerosol (*r<sub>d</sub>*), and size of haze droplets (*r*). In this study, *a<sub>s</sub>* for cloud droplets is calculated from laboratory-based parameterizations (Eq. 2 in Tang and Munkelwitz (1994)).

- Only diffusional growths of haze and cloud droplets are considered in our model. Collision coalescence, sedimentation, mixing, and entrainment are ignored. The growth of haze or cloud droplet for the *i*th bin is calculated from,
- 20

$$\frac{dr_i}{dt} = \frac{1}{r_i} \frac{S_e - S_{sat}}{G}, \quad (3)$$

where *G* is the growth parameter given by,

$$G = \left[ \frac{\rho_w R_v T}{D'_v e_s(T)} + \frac{\rho_w l_v}{k'_T T} \left( \frac{l_v}{R_v T} - 1 \right) \right]. \quad (4)$$

- 25 *D'<sub>v</sub>* and *k'<sub>T</sub>* are, respectively, the modified diffusion coefficient and the modified thermal diffusion coefficient (Lamb and Verlinde, 2011, p. 337-338),

$$D'_v = \frac{D_v}{\frac{r_i}{r_i + \lambda} + \frac{4D_v}{\alpha_m \bar{c}_{air} r_i}}, \quad (5)$$

and

$$k'_T = \frac{k_T}{\frac{r_i}{r_i + \lambda} + \frac{4k_T}{\alpha_T \bar{c}_{air} \rho_{air} c_{p,air} r_i}}. \quad (6)$$

Here  $D_v$  is the physical diffusion coefficient,  $k_T$  is the thermal diffusion coefficient,  $\lambda$  is the mean free path of air,  $\bar{c}_{air}$  is the mean molecular speed of air, and  $n_{air}$  is the number concentration of air.  $\alpha_m$  is the mass accommodation coefficient and  $\alpha_T$  is the thermal accommodation coefficient. In this study, we choose  $\alpha_m = 1.0$  and  $\alpha_T = 1.0$ .

5  $S_{sat}$  in the growth equation (Eq. 3) is calculated from the Köhler equation (Eq. 2). Therefore, the curvature effect (exponential part in Eq. 2) and the solute effect ( $a_s$  in Eq. 2) are considered during the growth process for each bin. It should be noted that there are several methods to calculate the solute effect with the relative deviations for activation ranging up to 20%, but the differences are small for droplet growth (Pöschl et al., 2009). In addition, different choices of parameters—such as  $\sigma_s$ ,  $\alpha_m$  and  $\alpha_T$ —can also cause differences in droplet growth (Kreidenweis et al., 2003). How the choices of  
10 different parameters would affect our results is worth studying in the future. The total simulation time is 3 hours, and variables are recorded every 1 s that include temperature, pressure, height, water vapor mixing ratio, as well as droplet size and number concentration for each bin.

### 3 Results and discussions

#### 15 3.1 Cloud droplet size distribution broadening

For the control case, the liquid water mixing ratio increases linearly with height in the ascending branches and decreases in the descending branches as shown in Figure 2a. Liquid water mixing ratio in the ascending branch is slightly smaller than that in the descending branch at the same height **due to the kinetic effect (or hysteresis effect), which is consistent with Korolev et al. (2013)**. The saturation ratio has an increasing trend in the ascending branch after each cycle, but has a decreasing trend in  
20 the descending branch (indicated by red and blue arrows in Figure 2b). Droplet size as a function of height in two bins **Droplet size for two moving bins** are shown in Figure 2c. **Droplet size in the bins monotonically increase with the dry aerosol mass associated with the bin**. The solid line is for the cloud droplet that formed on a dry aerosol of 503 nm and represents the largest droplet in our simulation. It grows in the ascending branch but it evaporates in the descending branch. Also, the droplet size for this bin increases after each cycle. The dashed line in Figure 2c is for the cloud droplet that formed on a dry  
25 aerosol of 51 nm. For this cloud droplet, the changes in radius with height are similar for the initial few cycles, after which the cloud droplet ~~totally evaporates~~ **deactivates and becomes a haze particle**. Ultimately, the aerosol is reactivated again as a cloud droplet by the end of the simulation (green dashed line). **Also notice that a second mode appears in the CDS D due to reactivation of aerosols after about 2 hours (see Figure 2d)**. Thus the CDS D broadens after each cycle as the larger droplets become larger and the smaller droplets either remain similarly sized or become smaller (~~see Figure 2d~~). All these features are  
30 consistent with Korolev (1995) (see Fig. 5 in his paper).

Korolev (1995) analytically investigate the narrowing and broadening of cloud droplet size distribution during condensation when solute and curvature effects are considered. He considers a cloud parcel oscillating vertically in simple harmonic motion.

Results show that the CDS is irreversible if solute and curvature effects are considered. Irreversibility of the CDS will not only promote the growth of large droplets, but it will also lead to the evaporation, or even deactivation of small cloud droplets, and thus broaden the CDS. However, the relative roles of the solute effect, curvature effect, deactivation and reactivation on the broadening of droplet size distributions have not been investigated.

5

To explore the relative roles of different factors in this CDS broadening mechanism, three more cases are tested here. For the first case, we turn off both the solute and curvature effects for all cloud droplets after 700 s; this is the time when the cloud parcel first reaches 50 m above cloud base and is just below the oscillation layer. **Specifically, we set  $S_{sat} = 1$  for all droplets.** The result is shown in Figure 3a. For this case, the CDS repeats for each cycle, consistent with Korolev et al. (2013), and the total cloud droplet number concentration ( $n$ ) is constant (red solid line in Figure 3d). For the second case, we only turn off the curvature effect but retain the solute effect. **Specifically, we ignore the exponential term in Eq. 2 such that  $S_{sat} = a_s$ .** The result in Figure 3b shows that the largest droplet (with the most solute) can grow after each cycle while the smallest droplet size (with the least solute amount) **associated with a moving bin** does not change much after each cycle. However ~~the size that largest droplet~~ **the largest droplet size that a bin** can reach is much smaller than that in the control case. Because the saturated water vapor pressure over a droplet formed on larger aerosol is lower than that formed on smaller aerosol due to the solute effect, the larger droplet grows faster than the smaller droplet in the updraft region, and it evaporates slower in the downdraft region. For this case, the solute effect alone cannot explain the larger cloud droplets in the control case. In addition,  $n$  is also a constant and droplet deactivation does not occur (green dashed line in Figure 3d). In the third case, we consider both curvature and solute effects, but we do not allow droplet reactivation. This means that once the droplet ~~totally evaporates~~ **deactivates** it cannot be activated again. The result in Figure 3c shows that the growth of the largest cloud droplet is similar to the control case, but the size of **the smallest cloud droplet associated with a bin** also increases after each cycle. The reason for this CDS broadening is the Ostwald ripening effect, where large droplets grow at the expense of small ones. Past studies have concluded that the ripening effect is typically slow and inefficient for droplet growth (Wood et al., 2002). But the vertical oscillations near cloud base that are considered here allow for droplet deactivation and result the decrease of  $n$  with time (see Figure 3d), as in the control case. Thus, the typically inefficient Ostwald ripening is amplified through the resulting deactivation of the smallest droplets. An early suggestion of this behavior is shown in Fig. 8 of Hagen (1979). The only difference between the control and this simulation is that  $n$  for the control case increases near the end of the simulation because of droplet reactivation (see Figure 3d). It should be mentioned that the step changes in  $n$  in Figure 3d are a result of using a discretized bin method to represent the continuous spectrum. A downward step in  $n$  means droplet deactivation, and an upwards step in  $n$  means droplet reactivation. Deactivation and reactivation can also be seen from the CDS qualitatively: droplet deactivation occurs when the peak value of CDS decreases (from red to blue as shown in Figure 2d), while droplet reactivation occurs when a subset of smaller cloud droplets appears.

From Figures 3 a and b, we can see that the solute effect contributes part of the CDS broadening compared with the control case. But the solute effect alone is not enough to explain the growth of the largest cloud droplet. Droplet deactivation, which is

35

related to the curvature effect, plays a crucial role here (see Figure 3c). Because the oscillations occur within the cloud region, 50 m above cloud base, droplet deactivation is surprising to us. There are two related questions: (1) Why and which droplet will deactivate? (2) Why is droplet deactivation related to the CDSB broadening?

5 The reason for the droplet deactivation is mainly because the cloud parcel experiences upwards and downwards oscillations. In the downdraft region, the air is subsaturated, which supports droplet evaporation. In addition, the saturated water vapor pressures over polydisperse droplets are different via both the solute and curvature effects. Smaller droplets with less solute and larger radii of curvature have higher saturated water vapor pressures, and thus evaporate faster than larger droplets in the downdraft region. Therefore, smaller droplets will evaporate first in the downdraft region.

10

The reason why droplet deactivation is related to the CDSB broadening can be explained in two ways. From the thermodynamic point of view, the liquid water mixing ratio is roughly a constant at a given height for each cycle (see Figure 2a). As the  $n$  decreases due to the droplet deactivation, we can expect that on average droplet size will be larger because the same amount of water will be redistributed on fewer cloud droplets. From the ~~kinematic~~ **kinetic** point of view, quasi-steady state  
15 supersaturation ( $s_{qs}$ ) will become larger after each cycle due to droplet deactivation, as shown in Figure 2b.  $s_{qs}$ , the environmental supersaturation in quasi-steady state, is inversely proportional to the integral of mean droplet size  $\bar{r}$  and droplet number concentration ( $n$ ),  $s_{qs} \propto (\bar{r}n)^{-1}$  (Lamb and Verlinde, 2011). Here the decrease in  $n$  due to droplet deactivation is much greater than the change of  $\bar{r}$ ; therefore,  $s_{qs}$  will increase with decreasing  $n$ . This means that larger droplets grow even faster in the updraft region, and smaller droplets evaporate even faster in the downdraft region – beyond the solute effect alone. Conversely,  
20 an increase in  $s_{qs}$  will enhance droplet deactivation for smaller droplets, and it will also reinforce the growth of larger droplets in a positive feedback.

One question relevant to precipitation initiation is how fast can the largest cloud droplet grow in an oscillating parcel compared with droplets in an ascending-only parcel? **For the latter case, the cloud parcel ascends at a vertical velocity of 0.5**  
25  **$m s^{-1}$  for three hours with the same initial condition as the control case. At the end of the simulation, the cloud parcel reaches about 6000 m and cloud droplets are supercooled (around 248 K), but we ignore ice nucleation in this study.** The mean (yellow dashed line) and largest/smallest (upper/lower gray dashed lines) cloud droplets in an ascending-only cloud parcel are also shown in Figure 2d. It can be seen that the size of the largest cloud droplet **in a moving bin** at cloud top in each cycle of the oscillating parcel (blue color bar) is similar to that in the ascending-only parcel (upper gray line). This is  
30 quite surprising because when the parcel reaches 1200 m for the first time (i.e., the top of the oscillation cycle), the largest cloud droplet radius is 9.07  $\mu m$  (see Table 1 and Figure 2c); however after several cycles, the largest cloud droplet radius is 17.3  $\mu m$ , still at 1200 m. The size is similar to the largest droplet size **associated with a moving bin** in an ascending-only parcel at a height of about 6000 m. This means that the largest cloud droplet size **for a bin** in an oscillating parcel at 1200 m is much larger than calculated from a traditional cloud parcel model (ascent only), and hence shows “superadiabatic” growth.  
35 ~~It should be mentioned that cloud droplets in the ascending-only parcel at 6000 m are supercooled (around 248 K), but we~~



ignore ice nucleation in this study. In addition, the size of the smallest cloud droplet **for a bin** and the mean droplet size are larger in an ascending-only parcel. Differences between the mean droplet sizes increases after each cycle, especially at the end of the simulation due to the reactivation of numerous small droplets. Therefore, the relative dispersion, which is the ratio of the standard deviation to the mean of a droplet size distribution, also increases after each cycle, and is much larger than in an ascending-only cloud parcel. Broadening of the CDS D might quicken precipitation processes, and the increase of the relative dispersion is relevant to the albedo effect and increase albedo susceptibility.

## 3.2 Sensitivity studies

In this subsection, we investigate effects of several factors on the CDS D in the adiabatic parcel model with vertical oscillations. These factors include variations in the total aerosol number concentration, updraft velocity, and thickness of the recycling re-circulation layer.

### 3.2.1 Effect of total aerosol number concentration

We test two other aerosol number concentrations by increasing and decreasing the number concentration of the control by an order of magnitude,  $10^2 \text{ cm}^{-3}$  and  $10^4 \text{ cm}^{-3}$ , and keep the median radius and geometric standard deviation the same as the control case (see Figures 4 a and c). **These values are chosen to represent the conditions for clean clouds ( $10^2 \text{ cm}^{-3}$ ) and polluted clouds ( $10^4 \text{ cm}^{-3}$ ), which are consistent with previous studies (e.g., Xue and Feingold, 2004; Chen et al., 2018).** The results show that the CDS D for the relatively clean case ( $10^2 \text{ cm}^{-3}$ ) behaves similarly to the solute effect alone (compare Figures 3b and 4b) – there is neither droplet deactivation nor reactivation. The CDS D broadening is due to the ripening effect alone, which is not as efficient as when it is accompanied by deactivation as in the control case. For the relatively polluted case ( $10^4 \text{ cm}^{-3}$ ), both droplet deactivation and reactivation occur (see Figure 4d). The largest cloud droplet acts similarly as that in the control case, while the smallest cloud droplet is larger 1.5 h into the simulation but then begins to become smaller compared with the control case. We interpret these observations as follows. For the clean case, all aerosols are activated, and all droplets are able to grow to a relatively large size, making them unlikely to deactivate. However for polluted case, not all CCN are activated, there are therefore some smaller droplets that cannot grow very large and they will evaporate first in the downdraft region. **Another explanation from Korolev (1995) is that the CDS D broadening occurs when air supersaturation ( $S_e$ ) is smaller than the critical supersaturation for the smallest cloud droplets ( $S_{sat}(r_{small})$ ). For this condition, the smallest cloud droplets evaporate and the largest cloud droplets might grow slightly if  $S_e > S_{sat}(r_{large})$  or evaporate slightly if  $S_e < S_{sat}(r_{large})$ , thus leading to broadening. If the water vapor mixing ratio in air on average is much larger than the saturated water vapor mixing ratio over droplet, only narrowing of the CDS D occurs. Because in-cloud supersaturation decreases with increased aerosol concentration, it is expected that the Ostwald ripening is more efficient in polluted cloud, which is also consistent with (Srivastava, 1991).**

### 3.2.2 Effect of vertical velocity

The effect of vertical velocity on the CDSB is investigated next. **Two vertical velocities ( $0.1 \text{ m s}^{-1}$  and  $1.0 \text{ m s}^{-1}$ ) are used to test their effects on CDSB broadening. These values are chosen based on observations that updraft in stratocumulus clouds is on the order of  $0.1 \text{ m s}^{-1}$  and in cumulus clouds is on the order of  $1.0 \text{ m s}^{-1}$  (Ditas et al., 2012; Katzwinkel et al., 2014).** For a relative low velocity of  $\pm 0.1 \text{ m s}^{-1}$ , the cloud parcel only experiences one and a half cycles within three hours (see Figure 5a). The parcel reaches cloud base around 1 hour, significantly later than the control case due to the small velocity (see Figure 5a). However, the largest cloud droplet size ultimately becomes similar to that in the control case, and we also see the cloud droplet number concentration decrease due to droplet deactivation. No droplet reactivation occurs because the small velocity generates a low supersaturation in the updraft region, which is unfavorable for droplet reactivation. For a relative high velocity of  $\pm 1.0 \text{ m s}^{-1}$ , the cloud parcel can cycle more times within three hours (see Figure 5c). The parcel reaches cloud base faster than the control case (see Figure 5c). **Here we keep the thickness of the recirculation layer constant. Therefore, larger vertical velocity results in a higher oscillation frequency.** Both droplet deactivation and reactivation occur in this case, and the largest and smallest cloud droplets behave similarly to the control case.

### 3.2.3 Effect of the thickness of recycling recirculation layer

**Turbulence driven by cloud-top radiative cooling can result in various eddy sizes in the stratocumulus-topped boundary layer (Wood, 2012).** Two different recycling layers recirculation layer depths are also tested,  $150 \text{ m}$  and  $350 \text{ m}$ , here to investigate the effect of eddy size on CDSB broadening. For a recycling recirculation layer of  $150 \text{ m}$ , which is  $100 \text{ m}$  thinner than the control case, the parcel experiences more cycles within three hours (see Figure 6a). The total cloud droplet number concentration decreases with time due to droplet deactivation, but no droplet reactivation occurs (see Figure 6b). Therefore the largest cloud droplet is similar to the control case, but the smaller cloud droplet is larger than in the control case. For a recycling recirculation layer of  $350 \text{ m}$ , the parcel can penetrate the cloud base each cycle (see Figure 6c). In this case, all cloud droplets are deactivated below cloud base and reactivated again when the cloud parcel is supersaturated in the next ascending branch. Therefore the CDSB is repeated and no broadening occurs.

## 3.3 Discussion

We have studied the effects of total aerosol number concentration, updraft velocity, and thickness of the recirculation layer on CDSB broadening. However we note that there are other parameters used in this study that can lead to the uncertainties in the results. For example, Takeda and Kuba (1982) found that using an insufficient number of model bins will lead to the narrow CDSB reported by Mordy (1959). Kreidenweis et al. (2003) found that both the spectral discretisation and the uncertainty in the value of mass accommodation coefficient can lead to uncertainty in the results. To test the effects of mass accommodation coefficient and spectrum discretization on the CDSB, two more sensitivity

studies are conducted. One case is to set mass accommodation coefficient ( $\alpha_m$ ) to 0.06 based on Shaw and Lamb (1999). It is expected that a smaller value of  $\alpha_m$  might suppress the growth of cloud droplets. The other case is to change the number of bins from 100 to 200, while keeping other parameters the same as in the control case.

5 Table 1 summarizes the microphysical properties at cloud top for different cases. When the cloud parcel first reaches about 1200 m, the largest cloud droplet radius **associated with a moving bin** ( $r_{max}$ ) is 9.1  $\mu m$  (case 0). If the cloud parcel continues rising for three hours as for the ascending-only case,  $r_{max} = 17 \mu m$  at 6000 m. However if the parcel experiences eyeing **recirculation** within cloud region,  $r_{max}$  can also be around 17  $\mu m$  as long as deactivation occurs, except for the low  $N_a$  case (see Table 1). **In addition if reactivation also occurs, the relative dispersions are closer to observations, which are usually**  
10 **larger than 0.1 (Liu and Daum, 2002; Chandrakar et al., 2016). If reactivation also occurs, the smallest cloud droplet radius associated with a moving bin**  $r_{min}$  **is around 5  $\mu m$  and the relative dispersion is larger than 0.1. It is interesting to note that low mass accommodation has a negligible effect on  $r_{max}$ , but it has a stronger impact on  $r_{min}$ . This will result in a broader CDS**  
15 **D compared with the control case. In addition, results for 200 bins are similar to that for the control case, which means that the 100 bins used in this study are enough to limit the uncertainty due to spectrum discretization.**

From the above, we see that droplet deactivation and droplet reactivation play crucially important roles in CDS broadening in this study. Deactivation of smaller droplets is important for the growth of larger cloud droplets (e.g., see Figures 2d, 3c, 4d, 5b,d and 6b). Droplet deactivation occurs in the descending branch for smaller droplets due to both the curvature and solute effects (Ostwald ripening). The evaporation of smaller cloud droplets with less solute makes water vapor available for the  
20 growth of other larger cloud droplets. On average, the largest cloud droplet size **for a moving bin** increases with time after each cycle.

Results from sensitivity studies show that relative dispersion is larger than 1.5 when both deactivation and reactivation occur (see Table 1), which is consistent with the values from observations and simulations (e.g., Miles et al.,  
25 2000; Liu and Daum, 2002; Lu and Seinfeld, 2006; Chandrakar et al., 2016). It should be mentioned that the CDS observed in previous studies might have the problem of instrumental broadening due to low instrument resolution or long-distance averaging of the sampling volume (Brennguier et al., 2011; Devenish et al., 2012). A broad CDS is also observed by recent holographic measurements, which limit the effect of instrument broadening and have much higher temporal and spatial resolution than other instruments, such as particle-counting probes (Beals et al., 2015; Glienke  
30 et al., 2017; Desai et al., 2018).

We note that deactivation is suppressed for a thin recirculation layer  $\Delta H = 150 m$  as shown in Figure 6b, and therefore the CDS broadening is not as efficient as the control case. However, the vertical oscillations of an air parcel due to turbulence might be much smaller than 150 m. Wood et al. (2002) did not observe the enhanced CDS broadening  
35 by deactivation and reactivation with a shallower recirculation layer. One interesting question is whether deactivation

or reactivation be inhibited for a very thin recirculation layer. To answer this question, three more cases are carried out with recirculation layers of 50 m, 5 m and 1 m. All these cases have the same setup as the control case except for the thickness of recirculation layer. The CDS and total cloud droplet number concentration for each case are shown in Figure 7. It can be seen that reactivation is inhibited for all cases, but deactivation always occurs. More interestingly, the CDS for all these three cases are similar, and the decrease of total cloud droplet number concentration due to deactivation is also similar. The evolution of the CDS for a thin recirculation layer is independent of air motion and degrades to a steady state where the CDS broadening is due to Ostward ripening in a still environment.

One interesting result is that the size of the largest cloud droplet associated with a moving bin within each cycle is similar to that in the ascending-only parcel (i.e., approximately within one micrometer), as shown in Figure 8. The general trends approximately follow a linear mass the growth rate that is independent of aerosol number concentration, vertical velocity and the thickness of the oscillation layer, as long as deactivation occurs. This suggests that the growth of the largest cloud droplets strongly depends on the amount of time such droplets remain in the cloud (residence time of cloud droplets), rather than the temporal variability of supersaturation in updrafts and downdrafts. The reason is that the environmental (i.e., the in-cloud) saturation ratio ( $S_e$ ) is buffered by the equilibrium saturation ratio ( $S_{sat}$ ) over smaller droplets. Figure 9 shows the changes of  $S_e$  and  $S_{sat}$  over two droplets (same used as in Figure 2c) in the control case. Instead of being symmetric around 1 for the pure water case (ignoring solute and curvature effects),  $S_e$  in the oscillating parcel is symmetric around  $S_{sat}$  over the small cloud droplets. For example before 1.5 hours, droplets formed on  $r_a = 51 nm$  are the smallest cloud droplets in the population, and the average  $S_e$  (gray line) during one oscillation is roughly symmetric around the blue line (Figure 9). The fact that  $S_e$  is buffered by  $S_{sat}$  over small cloud droplets is mainly because the number concentration of the smallest cloud droplet ( $36 cm^{-3}$  in the control case) is much larger than that of large cloud droplet ( $1.8 \times 10^{-9} cm^{-3}$ ). When those small droplets totally evaporate deactivate (between 1.5 to 2.5 hours),  $S_{sat}$  (blue line) for those deactivated droplets is the same as  $S_e$  (gray line). During this period,  $S_e$  is symmetric around  $S_{sat}$  over the remaining small droplets (larger than the droplets formed on  $r_a = 51 nm$  but smaller than for  $r_a = 503 nm$ ). When the droplets formed on  $r_a = 51 nm$  are reactivated (after 2.5 hours),  $S_e$  is symmetric around  $S_{sat}(r_a = 51 nm)$  again until they are deactivated. It should be mentioned that number concentration of those reactivated droplets increases steady after each cycle after 2.0 hours (See Figure 3d). By the end of the simulation, the number concentration of the reactivated droplets is similar to that of the remaining large droplets (about  $150 cm^{-3}$ ). Therefore, the effect of those reactivated droplets on the environmental saturation ratio becomes stronger after 2.0 hours (see Figure 9).

This symmetric property of  $S_e$  can be also explained using the quasi-steady supersaturation  $s_{qs}$ . For pure water droplets,  $s_{qs} \sim \frac{w}{nr}$  (Lamb and Verlinde, 2011). This can be obtained from the analytical expression of supersaturation in an adiabatic cloud parcel:  $\frac{dS_e}{dt} = Aw - Bnr(S_e - 1)$ , where A and B are parameters depending on thermodynamic properties (Korolev and Mazin, 2003). A symmetric distribution of  $w$  around 0 will generate a symmetric distribution of  $s_{qs}$  around 0 (i.e.,  $S_e$  around 1). If the curvature and solute effects are considered,  $s_{qs}$  will be symmetric around  $s_k$  given the same condition of  $w$ , because  $\frac{dS_e}{dt} = Aw - Bnr(S_e - S_{sat})$  and thus  $s_{qs} \sim \frac{w}{nr} + s_k$ , where  $s_k = S_{sat} - 1$  is the equilibrium supersaturation

ratio over a mono-disperse droplet. **In the updraft region, all droplets grow and the effect of  $s_k$  is negligible. In the down-draft region and** for polydisperse cloud droplets, the environment conditions are buffered by the large number of small cloud droplets. Therefore  $S_e$  is symmetric around  $S_{sat}$  over smaller droplets before they ~~totally evaporate~~ **deactivate** in the oscillating parcel.  $\overline{S_e} - S_{sat}$  controls the growth of a large droplet and it is positive on average. That is why the large droplets can  
5 grow after each cycle. In addition, the influence of  $S_e$  fluctuations on droplet growth is small if  $S_{sat}$  over a large droplet is much lower than  $S_e$  and its fluctuations. The extreme examples of this phenomenon are when droplets form on GCCN in warm clouds (Jensen and Nugent, 2017) or ice particles form in mixed phase clouds. Therefore, the growth of the large droplet here is dominated by its in-cloud lifetime. **Previous studies show that although the mean lifetime of cloud droplets is usually less than half an hour, the residence time for some lucky cloud droplets can be longer than one hour (e.g., Feingold et al.,**  
10 **1996; Kogan, 2006; Andrejczuk et al., 2008). Those long-lifetime cloud droplets might contribute to large droplets in the cloud, similar to long-lifetime ice particles in mixed-phase clouds (Yang et al., 2015).**

However if all cloud droplets are deactivated, CSDSD broadening does not occur (see Figure 6d). Without droplet deactivation, the CSDSD can also broaden due just to the solute effect, as is the case when the curvature effect is ignored (Figure 3b) or  
15 when the total aerosol number concentration is low (Figure 4b). CSDSD broadening due to the ripening effect without droplet deactivation is not as significant as it is with droplet deactivation, but it also might be important after several hours as suggested by Wood et al. (2002).

Droplet reactivation usually occurs in the updraft region after several cycles, and those reactivated droplets will be deactivated again in the downdraft region. Formation of smaller cloud droplets can broaden the CSDSD at smaller sizes, decrease the  
20 mean cloud droplet size, and increase the relative dispersion. Meanwhile, the generation of new cloud droplets also suppresses the growth of larger cloud droplets (see Figure 2d).

#### 4 Conclusions and atmospheric implications

25 In this study, we investigate the condensation growth of cloud droplets in an adiabatic parcel with vertical oscillations based on a ~~Lagrangian bin-microphysics~~ **moving-bin** cloud parcel model where cloud droplets are formed on polydisperse, sub-micrometer aerosol particles. Both the solute and curvature effects are considered for all cloud droplets before and after activation during the whole simulation. The CSDSD can also broaden by condensation growth due to Ostwald ripening together with droplet deactivation and reactivation, which is consistent with the results of Korolev (1995). Droplet deactivation occurs in the  
30 descending branch due to the combination of the solute and curvature effects. Deactivation of smaller droplets makes water vapor available for other larger droplets, and thus broadens the CSDSD at larger sizes. The growth of the largest cloud droplet **in a vertically oscillating cloud parcel** approximately follows a ~~linear-mass~~ **the growth rate in an ascending-only cloud parcel** after each cycle, and it is independent of aerosol number concentration, vertical velocity, and the thickness of the oscillation

layer, as long as deactivation occurs. The size of the largest cloud droplet strongly depends on the time that droplet remains in the cloud rather than on the variability of the in-cloud supersaturation. This is because the environmental air is buffered by the large number of smaller cloud droplets: the environmental saturation ratio in an oscillating parcel is symmetric around the equilibrium saturation ratio over smaller cloud droplets. The ~~linear mass growth rate~~ **for the largest cloud droplets** can be used to roughly estimate the ~~right upper boundary~~ **large-size upper boundary** of the CDSO, at least in this study. Droplet reactivation usually occurs after a few cycles. These cloud droplets are activated in the ascending branch, and deactivated in the descending branch. They are usually very small (less than  $5 \mu\text{m}$ ) and thus broaden the CDSO at smaller sizes. The mean cloud droplet size significantly decreases when reactivation occurs, which leads to an increase in relative dispersion. On the other hand, those newly-formed cloud droplets compete against other cloud droplets for water vapor, thus suppressing the growth of larger cloud droplets.

We note that there are additional factors that might affect droplet growth that are not treated in this study. For example, we do not consider the sedimentation of cloud droplets in this study, similar to Korolev et al. (2013) and Jensen and Nugent (2017). This is a reasonable assumption for an updraft velocity of  $0.5 \text{ m s}^{-1}$  or above, but ignoring sedimentation in the low velocity case ( $0.1 \text{ m s}^{-1}$ ) will limit the accuracy of our results. ~~Entrainment and mixing are also ignored here.~~ In addition, we do not consider the collision coalescence between droplets. Although CDSO broadening is favorable for collision processes, it might be interesting to determine how this broadening will accelerate rain formation.

We have used idealized simulations to find this new CDSO broadening mechanism, so it is reasonable to ask if this mechanism is likely to occur in nature. To answer this question, we investigate the two necessary conditions for this mechanism and address whether these conditions exist in real clouds. The first necessary condition is that droplets form on polydisperse aerosol particles with different solute effects. This is a very general occurrence in the atmosphere due to the complexity of aerosol size and composition (Murphy et al., 1998; Khain et al., 2000). The second necessary condition is that a cloud experiences upward and downward oscillations. This is also a general occurrence in natural clouds due to turbulence and circulations that can become established within a cloud layer (Wood, 2012). Therefore we expect that this mechanism of CDSO broadening is possible in the real clouds.

**It should be mentioned that one limitation of this study arises from the use of the adiabatic assumption for three-hour simulations. Turbulence can result in not only upward and downward oscillations but also in entrainment and mixing (Shaw, 2003; Devenish et al., 2012). The latter can cause cloud droplet evaporation, deactivation and reactivation (Korolev et al., 2013; Yang et al., 2016). In addition, the lifetime of the cloud parcel is usually less than one hour (Andrejczuk et al., 2008). Therefore, one should be aware that results in this study are based on a very idealized state. More realistic studies should consider mixing processes where for example a trajectory ensemble model would be a suitable tool (Ovchinnikov and Easter, 2010; Feingold et al., 1998). How important this mechanism is to CDSO broadening**

in real clouds compared with other mechanisms is worth future investigation, but is beyond the scope of this study.

There is an implication of this mechanism for the cloud modeling community. Most of the bulk and bin microphysical schemes only consider the curvature and solute effects during the activation process based on Köhler theory. Cloud droplets are assumed to be pure water after they are activated. Tracking the solute distribution for each bin of cloud droplet is possible **using a joint 2-D bin aerosol-cloud microphysical scheme**, but **it is** very computationally expensive (e.g., Andrejczuk et al., 2010; Ovchinnikov and Easter, 2010; Lebo and Seinfeld, 2011). The mechanism of CDSB broadening in this study requires the model to consider both solute and curvature effects **all the time (i.e., before and after activation, deactivation and reactivation)**. **Our results suggest the importance of solute and curvature effects to the deactivation and reactivation processes, which are consistent with previous studies (e.g., Andrejczuk et al., 2008; Hoffmann et al., 2015; Hoffmann, 2017; Chen et al., 2018). However the results are counter to some other studies where details of activation and deactivation are argued to be unimportant in the cloud simulation (e.g., Srivastava, 1991; Chuang et al., 1997; Grabowski et al., 2018).** Large eddy simulations with a similar microphysical treatment would be useful to investigate how important this mechanism is to CDSB broadening in more realistic clouds.

15

*Acknowledgements.* F.Y., P.K. and A.M.V. were supported by the U.S. Department of Energy (DOE) under Contract DE-SC0012704. R.A.S. was supported by the DOE Office of Science as part of the Atmospheric System Research program through grant no. DE-SC0011690.

## References

- Andrejczuk, M., Reisner, J., Henson, B., Dubey, M., and Jeffery, C.: The potential impacts of pollution on a nondrizzling stratus deck: Does aerosol number matter more than type?, *J. Geophys. Res.—Atmos.*, 113, D19 204, doi:10.1029/2007JD009445, 2008.
- Andrejczuk, M., Grabowski, W., Reisner, J., and Gadian, A.: Cloud-aerosol interactions for boundary layer stratocumulus in the Lagrangian Cloud Model, *J. Geophys. Res.—Atmos.*, 115, D22 214, doi:10.1029/2010JD014248, 2010.
- Arabas, S. and Shima, S.-i.: On the CCN (de)activation nonlinearities, *Nonlinear Proc. Geoph.*, 24, 535, doi:10.5194/npg-24-535-2017, 2017.
- Beals, M. J., Fugal, J. P., Shaw, R. A., Lu, J., Spuler, S. M., and Stith, J. L.: Holographic measurements of inhomogeneous cloud mixing at the centimeter scale, *Science*, 350, 87–90, doi:10.1126/science.aab0751, 2015.
- Boucher, O., Randall, D., Artaxo, P., Bretherton, C., Feingold, G., Forster, P., Kerminen, V.-M., Kondo, Y., Liao, H., Lohmann, U., et al.: Clouds and aerosols, in: *Climate change 2013: the physical science basis. Contribution of Working Group I to the Fifth Assessment Report of the Intergovernmental Panel on Climate Change*, pp. 571–657, Cambridge University Press, doi:10.1017/CBO9781107415324, 2013.
- Brenguier, J.-L., Burnet, F., and Geoffroy, O.: Cloud optical thickness and liquid water path—does the  $k$  coefficient vary with droplet concentration?, *Atmos. Chem. Phys.*, 11, 9771–9786, doi:10.5194/acp-11-9771-2011, 2011.
- Brown, P. N., Byrne, G. D., and Hindmarsh, A. C.: VODE: A variable-coefficient ODE solver, *SIAM J. Sci. Stat. Comp.*, 10, 1038–1051, doi:10.1137/0910062, 1989.
- Çelik, F. and Marwitz, J. D.: Droplet Spectra Broadening by Ripening Process. Part I: Roles of Curvature and Salinity of Cloud Droplets, *J. Atmos. Sci.*, 56, 3091–3105, doi:10.1175/1520-0469(1999)056<3091:DSBBRP>2.0.CO;2, 1999.
- Chandrakar, K. K., Cantrell, W., Chang, K., Ciochetto, D., Niedermeier, D., Ovchinnikov, M., Shaw, R. A., and Yang, F.: Aerosol indirect effect from turbulence-induced broadening of cloud-droplet size distributions, *P. Natl. Acad. Sci. USA*, 113, 14 243–14 248, doi:10.1073/pnas.1612686113, 2016.
- Chen, J., Liu, Y., Zhang, M., and Peng, Y.: Height Dependency of Aerosol-Cloud Interaction Regimes, *J. Geophys. Res.—Atmos.*, 123, 491–506, doi:10.1002/2017JD027431, 2018.
- Cheng, W. Y., Carrió, G. G., Cotton, W. R., and Saleeby, S. M.: Influence of cloud condensation and giant cloud condensation nuclei on the development of precipitating trade wind cumuli in a large eddy simulation, *J. Geophys. Res.—Atmos.*, 114, D08 201, doi:10.1029/2008JD011011, 2009.
- Chuang, P., Charlson, R. J., and Seinfeld, J.: Kinetic limitations on droplet formation in clouds, *Nature*, 390, 594, doi:10.1038/37576, 1997.
- Cooper, W. A.: Effects of variable droplet growth histories on droplet size distributions. Part I: Theory, *J. Atmos. Sci.*, 46, 1301–1311, doi:10.1175/1520-0469(1989)046<1301:EOVDGH>2.0.CO;2, 1989.
- Cooper, W. A., Lasher-Trapp, S. G., and Blyth, A. M.: The Influence of Entrainment and Mixing on the Initial Formation of Rain in a Warm Cumulus Cloud, *J. Atmos. Sci.*, 70, 1727–1743, doi:10.1175/JAS-D-12-0128.1, 2013.
- de Lozar, A. and Muessle, L.: Long-resident droplets at the stratocumulus top, *Atmos. Chem. Phys.*, 16, 6563–6576, doi:10.5194/acp-16-6563-2016, 2016.
- Desai, N., Chandrakar, K., Chang, K., Cantrell, W., and Shaw, R.: Influence of Microphysical Variability on Stochastic Condensation in a Turbulent Laboratory Cloud, *J. Atmos. Sci.*, 75, 189–201, doi:10.1175/JAS-D-17-0158.1, 2018.
- Devenish, B., Bartello, P., Brenguier, J.-L., Collins, L., Grabowski, W., IJzermans, R., Malinowski, S., Reeks, M., Vassilicos, J., Wang, L.-P., et al.: Droplet growth in warm turbulent clouds, *Q. J. Roy. Meteor. Soc.*, 138, 1401–1429, doi:10.1002/qj.1897, 2012.



- Ditas, F., Shaw, R. A., Siebert, H., Simmel, M., Wehner, B., and Wiedensohler, A.: Aerosols-cloud microphysics-thermodynamics-turbulence: evaluating supersaturation in a marine stratocumulus cloud, *Atmos. Chem. Phys.*, 12, 2459–2468, doi:10.5194/acp-12-2459-2012, 2012.
- Ervens, B. and Feingold, G.: On the representation of immersion and condensation freezing in cloud models using different nucleation schemes, *Atmos. Chem. Phys.*, 12, 5807–5826, doi:10.5194/acp-12-5807-2012, 2012.
- 5 Falkovich, G. and Pumir, A.: Sling effect in collisions of water droplets in turbulent clouds, *J. Atmos. Sci.*, 64, 4497–4505, doi:10.1175/2007JAS2371.1, 2007.
- Feingold, G. and Heymsfield, A. J.: Parameterizations of Condensational Growth of Droplets for Use in General Circulation Models, *J. Atmos. Sci.*, 49, 2325–2342, doi:10.1175/1520-0469(1992)049<2325:POCGOD>2.0.CO;2, 1992.
- Feingold, G. and Kreidenweis, S.: Does cloud processing of aerosol enhance droplet concentrations?, *J. Geophys. Res.—Atmos.*, 105, 24 351–24 361, doi:10.1029/2000JD900369, 2000.
- 10 Feingold, G. and Siebert, H.: Cloud-Aerosol Interactions from the Micro to the Cloud Scale, in: *Clouds in the Perturbed Climate System: Their Relationship to Energy Balance, Atmospheric Dynamics, and Precipitation*, pp. 319–338, MIT Press, doi:10.7551/mitpress/9780262012874.001.0001, 2009.
- Feingold, G., Cotton, W., Stevens, B., and Frisch, A.: The relationship between drop in-cloud residence time and drizzle production in numerically simulated stratocumulus clouds, *J. Atmos. Sci.*, 53, 1108–1122, doi:10.1175/1520-0469(1996)053<1108:TRBDIC>2.0.CO;2, 1996.
- 15 Feingold, G., Boers, R., Stevens, B., and Cotton, W. R.: A modeling study of the effect of drizzle on cloud optical depth and susceptibility, *J. Geophys. Res.—Atmos.*, 102, 13 527–13 534, doi:10.1029/97JD00963, 1997.
- Feingold, G., Kreidenweis, S. M., and Zhang, Y.: Stratocumulus processing of gases and cloud condensation nuclei: 1. Trajectory ensemble model, *J. Geophys. Res.—Atmos.*, 103, 19 527–19 542, doi:10.1029/98JD01750, 1998.
- 20 Feingold, G., Cotton, W. R., Kreidenweis, S. M., and Davis, J. T.: The Impact of Giant Cloud Condensation Nuclei on Drizzle Formation in Stratocumulus: Implications for Cloud Radiative Properties, *J. Atmos. Sci.*, 56, 4100–4117, doi:10.1175/1520-0469(1999)056<4100:TIOGCC>2.0.CO;2, 1999.
- Glienke, S., Kostinski, A., Fugal, J., Shaw, R., Borrmann, S., and Stith, J.: Cloud droplets to drizzle: contribution of transition drops to microphysical and optical properties of marine stratocumulus clouds, *Geophys. Res. Lett.*, 44, 8002–8010, doi:10.1002/2017GL074430, 2017.
- 25 Göke, S., Ochs III, H. T., and Rauber, R. M.: Radar Analysis of Precipitation Initiation in Maritime versus Continental Clouds near the Florida Coast: Inferences Concerning the Role of CCN and Giant Nuclei, *J. Atmos. Sci.*, 64, 3695–3707, doi:10.1175/JAS3961.1, 2007.
- Grabowski, W. W. and Abade, G. C.: Broadening of Cloud Droplet Spectra Through Eddy Hopping: Turbulent Adiabatic Parcel Simulations, *J. Atmos. Sci.*, 74, 1485–1493, doi:10.1175/JAS-D-17-0043.1, 2017.
- 30 Grabowski, W. W. and Wang, L.-P.: Growth of Cloud Droplets in a Turbulent Environment, *Annu. Rev. Fluid Mech.*, 45, 293–324, doi:10.1146/annurev-fluid-011212-140750, 2013.
- Grabowski, W. W., Dziekan, P., and Pawlowska, H.: Lagrangian condensation microphysics with Twomey CCN activation, *Geosci. Model Dev.*, 11, 103, doi:10.5194/gmd-11-103-2018, 2018.
- 35 Hagen, D. E.: A numerical cloud model for the support of laboratory experimentation, *J. Appl. Meteorol.*, 18, 1035–1043, doi:10.1175/1520-0450(1979)018<1035:ANCMFT>2.0.CO;2, 1979.

- Hammer, E., Bukowiecki, N., Luo, B., Lohmann, U., Marcolli, C., Weingartner, E., Baltensperger, U., and Hoyle, C.: Sensitivity estimations for cloud droplet formation in the vicinity of the high-alpine research station Jungfraujoch (3580 m a.s.l.), *Atmos. Chem. Phys.*, 15, 10309–10323, doi:10.5194/acp-15-10309-2015, 2015.
- 5 Heymsfield, A. J. and Sabin, R. M.: Cirrus Crystal Nucleation by Homogeneous Freezing of Solution Droplets, *J. Atmos. Sci.*, 46, 2252–2264, doi:10.1175/1520-0469(1989)046<2252:CCNBHF>2.0.CO;2, 1989.
- Hoffmann, F.: On the limits of Köhler activation theory: how do collision and coalescence affect the activation of aerosols?, *Atmos. Chem. Phys.*, 17, 8343–8356, doi:10.5194/acp-17-8343-2017, 2017.
- Hoffmann, F., Raasch, S., and Noh, Y.: Entrainment of aerosols and their activation in a shallow cumulus cloud studied with a coupled LCM–LES approach, *Atmos. Res.*, 156, 43–57, doi:10.1016/j.atmosres.2014.12.008, 2015.
- 10 Howell, W. E.: The growth of cloud drops in uniformly cooled air, *J. Meteorol.*, 6, 134–149, doi:10.1175/1520-0469(1949)006<0134:TGOCDI>2.0.CO;2, 1949.
- Jensen, J. B. and Lee, S.: Giant Sea-Salt Aerosols and Warm Rain Formation in Marine Stratocumulus, *J. Atmos. Sci.*, 65, 3678–3694, doi:10.1175/2008JAS2617.1, 2008.
- Jensen, J. B. and Nugent, A. D.: Condensational growth of drops formed on giant sea-salt aerosol particles, *J. Atmos. Sci.*, 74, 679–697, doi:10.1175/JAS-D-15-0370.1, 2017.
- 15 Katzwinkel, J., Siebert, H., Heus, T., and Shaw, R. A.: Measurements of Turbulent Mixing and Subsiding Shells in Trade Wind Cumuli, *J. Atmos. Sci.*, 71, 2810–2822, doi:10.1175/JAS-D-13-0222.1, 2014.
- Khain, A., Ovtchinnikov, M., Pinsky, M., Pokrovsky, A., and Krugliak, H.: Notes on the state-of-the-art numerical modeling of cloud microphysics, *Atmos. Res.*, 55, 159–224, doi:10.1016/S0169-8095(00)00064-8, 2000.
- 20 Khain, A., Beheng, K., Heymsfield, A., Korolev, A., Krichak, S., Levin, Z., Pinsky, M., Phillips, V., Prabhakaran, T., Teller, A., et al.: Representation of microphysical processes in cloud-resolving models: Spectral (bin) microphysics versus bulk parameterization, *Rev. Geophys.*, 53, 247–322, doi:10.1002/2014RG000468, 2015.
- Khvorostyanov, V. I. and Curry, J. A.: Toward the Theory of Stochastic Condensation in Clouds. Part I: A General Kinetic Equation, *J. Atmos. Sci.*, 56, 3985–3996, doi:10.1175/1520-0469(1999)056<3985:TTTOSC>2.0.CO;2, 1999.
- 25 Kogan, Y. L.: Large-eddy simulation of air parcels in stratocumulus clouds: Time scales and spatial variability, *J. Atmos. Sci.*, 63, 952–967, doi:10.1175/JAS3665.1, 2006.
- Korolev, A., Pinsky, M., and Khain, A.: A New Mechanism of Droplet Size Distribution Broadening during Diffusional Growth, *J. Atmos. Sci.*, 70, 2051–2071, doi:10.1175/JAS-D-12-0182.1, 2013.
- Korolev, A. V.: The Influence of Supersaturation Fluctuations on Droplet Size Spectra Formation, *J. Atmos. Sci.*, 52, 3620–3634, doi:10.1175/1520-0469(1995)052<3620:TIOSFO>2.0.CO;2, 1995.
- 30 Korolev, A. V. and Mazin, I. P.: Supersaturation of Water Vapor in Clouds, *J. Atmos. Sci.*, 60, 2957–2974, doi:10.1175/1520-0469(2003)060<2957:SOWVIC>2.0.CO;2, 2003.
- Kostinski, A. B. and Shaw, R. A.: Fluctuations and luck in droplet growth by coalescence, *B. Am. Meteorol. Soc.*, 86, 235–244, doi:10.1175/BAMS-86-2-235, 2005.
- 35 Kreidenweis, S. M., Walcek, C. J., Feingold, G., Gong, W., Jacobson, M. Z., Kim, C.-H., Liu, X., Penner, J. E., Nenes, A., and Seinfeld, J. H.: Modification of aerosol mass and size distribution due to aqueous-phase  $SO_2$  oxidation in clouds: Comparisons of several models, *J. Geophys. Res.—Atmos.*, 108, 4213, doi:10.1029/2002JD002697, 2003.

- Laird, N. F., Ochs III, H. T., Rauber, R. M., and Miller, L. J.: Initial Precipitation Formation in Warm Florida Cumulus, *J. Atmos. Sci.*, *57*, 3740–3751, doi:10.1175/1520-0469(2000)057<3740:IPFIWF>2.0.CO;2, 2000.
- Lamb, D. and Verlinde, J.: *Physics and Chemistry of Clouds*, Cambridge University Press, doi:10.1017/CBO9780511976377, 2011.
- Lasher-Trapp, S. G., Cooper, W. A., and Blyth, A. M.: Broadening of droplet size distributions from entrainment and mixing in a cumulus  
5 cloud, *Q. J. Roy. Meteor. Soc.*, *131*, 195–220, doi:10.1256/qj.03.199, 2005.
- Lebo, Z. and Seinfeld, J.: A continuous spectral aerosol-droplet microphysics model, *Atmos. Chem. Phys.*, *11*, 12297–12316, doi:10.5194/acp-11-12297-2011, 2011.
- Li, Z., Xue, H., and Yang, F.: A modeling study of ice formation affected by aerosols, *J. Geophys. Res.—Atmos.*, *118*, 11213–11227, doi:10.1002/jgrd.50861, 2013.
- 10 Liu, Y. and Daum, P. H.: Anthropogenic aerosols: Indirect warming effect from dispersion forcing, *Nature*, *419*, 580–581, doi:10.1038/419580a, 2002.
- Lu, M.-L. and Seinfeld, J. H.: Effect of aerosol number concentration on cloud droplet dispersion: A large-eddy simulation study and implications for aerosol indirect forcing, *J. Geophys. Res.—Atmos.*, *111*, D02207, doi:10.1029/2005JD006419, 2006.
- McGraw, R. and Liu, Y.: Brownian drift-diffusion model for evolution of droplet size distributions in turbulent clouds, *Geophys. Res. Lett.*,  
15 *33*, doi:10.1029/2005GL023545, 2006.
- Miles, N. L., Verlinde, J., and Clothiaux, E. E.: Cloud Droplet Size Distributions in Low-Level Stratiform Clouds, *J. Atmos. Sci.*, *57*, 295–311, doi:10.1175/1520-0469(2000)057<0295:CDSDIL>2.0.CO;2, 2000.
- Mordy, W.: Computations of the Growth by Condensation of a Population of Cloud Droplets, *Tellus*, *11*, 16–44, doi:10.1111/j.2153-3490.1959.tb00003.x, 1959.
- 20 Murphy, D., Thomson, D., and Mahoney, M.: In situ measurements of organics, meteoritic material, mercury, and other elements in aerosols at 5 to 19 kilometers, *Science*, *282*, 1664–1669, doi:10.1126/science.282.5394.1664, 1998.
- Naumann, A. K. and Seifert, A.: A Lagrangian drop model to study warm rain microphysical processes in shallow cumulus, *J. Adv. Model Earth Sy.*, *7*, 1136–1154, doi:10.1002/2015MS000456, 2015.
- Ovchinnikov, M. and Easter, R. C.: Modeling aerosol growth by aqueous chemistry in a nonprecipitating stratiform cloud, *J. Geophys. Res.—Atmos.*, *115*, D14210, doi:10.1029/2009JD012816, 2010.
- 25 Paluch, I. R.: Theoretical collision efficiencies of charged cloud droplets, *J. Geophys. Res.*, *75*, 1633–1640, doi:10.1029/JC075i009p01633, 1970.
- Pöschl, U., Rose, D., and Andreae, M.: Climatologies of Cloud-related Aerosols. Part 2: Particle Hygroscopicity and Cloud Condensation Nucleus Activity, in: *Clouds in the Perturbed Climate System: Their Relationship to Energy Balance, Atmospheric Dynamics, and Precipitation*, pp. 58–72, MIT Press, doi:10.7551/mitpress/9780262012874.001.0001, 2009.
- 30 Pruppacher, H. R. and Klett, J. D.: *Microphysics of Clouds and Precipitation*, Springer Science & Business Media, doi:10.1007/978-0-306-48100-0, 2010.
- Sardina, G., Picano, F., Brandt, L., and Caballero, R.: Continuous growth of droplet size variance due to condensation in turbulent clouds, *Phys. Rev. Lett.*, *115*, 184501, doi:10.1103/PhysRevLett.115.184501, 2015.
- 35 Sardina, G., Poulain, S., Brandt, L., and Caballero, R.: Broadening of Cloud Droplet Size Spectra by Stochastic Condensation: Effects of Mean Updraft Velocity and CCN Activation, *J. Atmos. Sci.*, *75*, 451–467, doi:10.1175/JAS-D-17-0241.1, 2018.
- Shaw, R. A.: Particle-turbulence interactions in atmospheric clouds, *Annu. Rev. Fluid Mech.*, *35*, 183–227, doi:10.1146/annurev.fluid.35.101101.161125, 2003.

- Shaw, R. A. and Lamb, D.: Experimental determination of the thermal accommodation and condensation coefficients of water, *J. Chem. Phys.*, 111, 10 659–10 663, doi:10.1063/1.480419, 1999.
- Siebert, H. and Shaw, R. A.: Supersaturation Fluctuations during the Early Stage of Cumulus Formation, *J. Atmos. Sci.*, 74, 975–988, doi:10.1175/JAS-D-16-0115.1, 2017.
- 5 Siewert, C., Bec, J., and Krstulovic, G.: Statistical steady state in turbulent droplet condensation, *J. Fluid Mech.*, 810, 254–280, doi:10.1017/jfm.2016.712, 2017.
- Srivastava, R.: Growth of Cloud Drops by Condensation: Effect of Surface Tension on the Dispersion of Drop Sizes, *J. Atmos. Sci.*, 48, 1596–1599, doi:10.1175/1520-0469(1991)048<1596:GOCDBC>2.0.CO;2, 1991.
- Takeda, T. and Kuba, N.: Numerical study of the effect of CCN on the size distribution of cloud droplets, *J. Meteorol. Soc. Jpn.*, 60, 978–993, doi:10.2151/jmsj1965.60.4\_978, 1982.
- 10 Tang, I. and Munkelwitz, H.: Water activities, densities, and refractive indices of aqueous sulfates and sodium nitrate droplets of atmospheric importance, *J. Geophys. Res.—Atmos.*, 99, 18 801–18 808, doi:10.1029/94JD01345, 1994.
- Wood, R.: Stratocumulus Clouds, *Mon. Weather Rev.*, 140, 2373–2423, doi:10.1175/MWR-D-11-00121.1, 2012.
- Wood, R., Irons, S., and Jonas, P.: How Important is the Spectral Ripening Effect in Stratiform Boundary Layer Clouds? Studies Using Simple Trajectory Analysis, *J. Atmos. Sci.*, 59, 2681–2693, doi:10.1175/1520-0469(2002)059<2681:HIITSR>2.0.CO;2, 2002.
- 15 Xue, H. and Feingold, G.: A modeling study of the effect of nitric acid on cloud properties, *J. Geophys. Res.—Atmos.*, 109, D18 204, doi:10.1029/2004JD004750, 2004.
- Yang, F., Xue, H., Deng, Z., Zhao, C., and Zhang, Q.: A closure study of cloud condensation nuclei in the North China Plain using droplet kinetic condensational growth model, *Atmos. Chem. Phys.*, 12, 5399–5411, doi:10.5194/acp-12-5399-2012, 2012.
- 20 Yang, F., Ovchinnikov, M., and Shaw, R. A.: Long-lifetime ice particles in mixed-phase stratiform clouds: Quasi-steady and recycled growth, *J. Geophys. Res.—Atmos.*, 120, 11 617–11 635, doi:10.1002/2015JD023679, 2015.
- Yang, F., Shaw, R., and Xue, H.: Conditions for super-adiabatic droplet growth after entrainment mixing, *Atmos. Chem. Phys.*, 16, 9421–9433, doi:10.5194/acp-16-9421-2016, 2016.
- Yin, Y., Levin, Z., Reisin, T. G., and Tzivion, S.: The effects of giant cloud condensation nuclei on the development of precipitation in convective clouds—A numerical study, *Atmos. Res.*, 53, 91–116, doi:10.1016/S0169-8095(99)00046-0, 2000.
- 25

**Table 1.** Microphysical properties at cloud top for different cases:  $r_{max}$  is the largest cloud droplet radius **in a moving bin**,  $r_{min}$  is the smallest cloud droplet radius **in a bin**,  $\bar{r}$  is the mean cloud droplet size,  $\sigma$  is the standard deviation of droplet radius, and  $\sigma/\bar{r}$  is the relative dispersion. Case 0 is when the cloud parcel reaches the cloud top for the first time with the same setup as the control case (shown as black circle in Figure 3). For other cases, results represent the parcel at cloud top for the last time after 3 hours simulation; the example of the control case is shown as the green circle in Figure 3.

|                      | $r_{max}$ ( $\mu m$ ) | $r_{min}$ ( $\mu m$ ) | $\bar{r}$ ( $\mu m$ ) | $\sigma$ ( $\mu m$ ) | $\frac{\sigma}{\bar{r}}$ | deactivation | reactivation |
|----------------------|-----------------------|-----------------------|-----------------------|----------------------|--------------------------|--------------|--------------|
| case 0               | 9.1                   | 4.2                   | 5.8                   | 0.5                  | 0.088                    | no           | no           |
| ascending only       | 17                    | 12                    | 13                    | 0.55                 | 0.041                    | no           | no           |
| control              | 17                    | 6.1                   | 7.5                   | 1.6                  | <b>0.22</b>              | <b>yes</b>   | <b>yes</b>   |
| $\alpha_m = 0.06$    | 17                    | 5.1                   | 7.0                   | 1.9                  | <b>0.27</b>              | <b>yes</b>   | <b>yes</b>   |
| $N_{bin}=200$        | 17                    | 5.9                   | 7.5                   | 1.6                  | <b>0.22</b>              | <b>yes</b>   | <b>yes</b>   |
| pure water           | 7.8                   | 5.9                   | 6.0                   | 0.086                | 0.014                    | no           | no           |
| only solute effect   | 13                    | 5.8                   | 6.0                   | 0.21                 | 0.035                    | no           | no           |
| without reactivation | 18                    | 7.9                   | 10                    | 1.1                  | 0.11                     | <b>yes</b>   | no           |
| low $N_a$            | 16                    | 9.6                   | 11                    | 0.40                 | 0.036                    | no           | no           |
| high $N_a$           | 17                    | 3.1                   | 4.7                   | 1.5                  | <b>0.32</b>              | <b>yes</b>   | <b>yes</b>   |
| low $w$              | 13                    | 7.7                   | 8.8                   | 0.60                 | 0.068                    | <b>yes</b>   | no           |
| high $w$             | 17                    | 4.6                   | 5.3                   | 1.0                  | <b>0.19</b>              | <b>yes</b>   | <b>yes</b>   |
| thin $\Delta H$      | 17                    | 6.2                   | 8.5                   | 1.4                  | <b>0.16</b>              | <b>yes</b>   | <b>yes</b>   |
| thick $\Delta H$     | 9.0                   | 4.1                   | 5.8                   | 0.50                 | 0.087                    | no           | <b>yes</b>   |

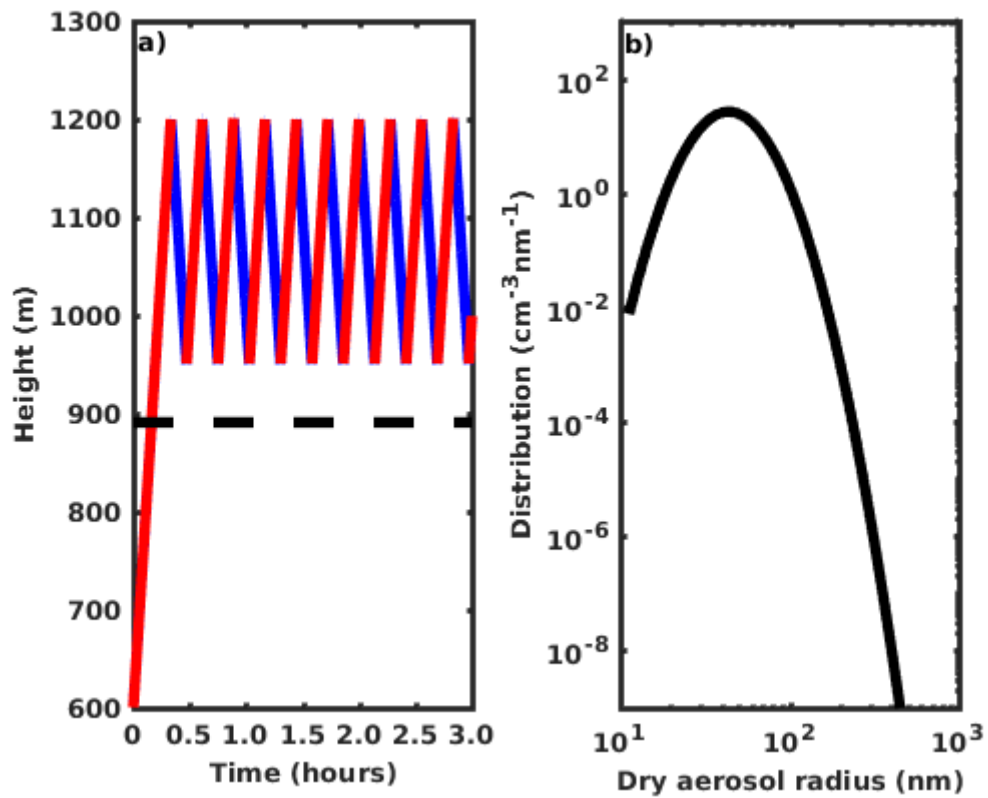

**Figure 1.** a) Trajectory of cloud parcel with upward and downward oscillations. Velocity is constant and is  $0.5 \text{ m s}^{-1}$  for the ascending parcel and  $-0.5 \text{ m s}^{-1}$  for the descending parcel. The dashed line is the cloud base, and the red and blue lines represent ascending and descending parcels. b) Initial dry aerosol size distribution. The total aerosol number concentration is  $1000 \text{ cm}^{-3}$ .

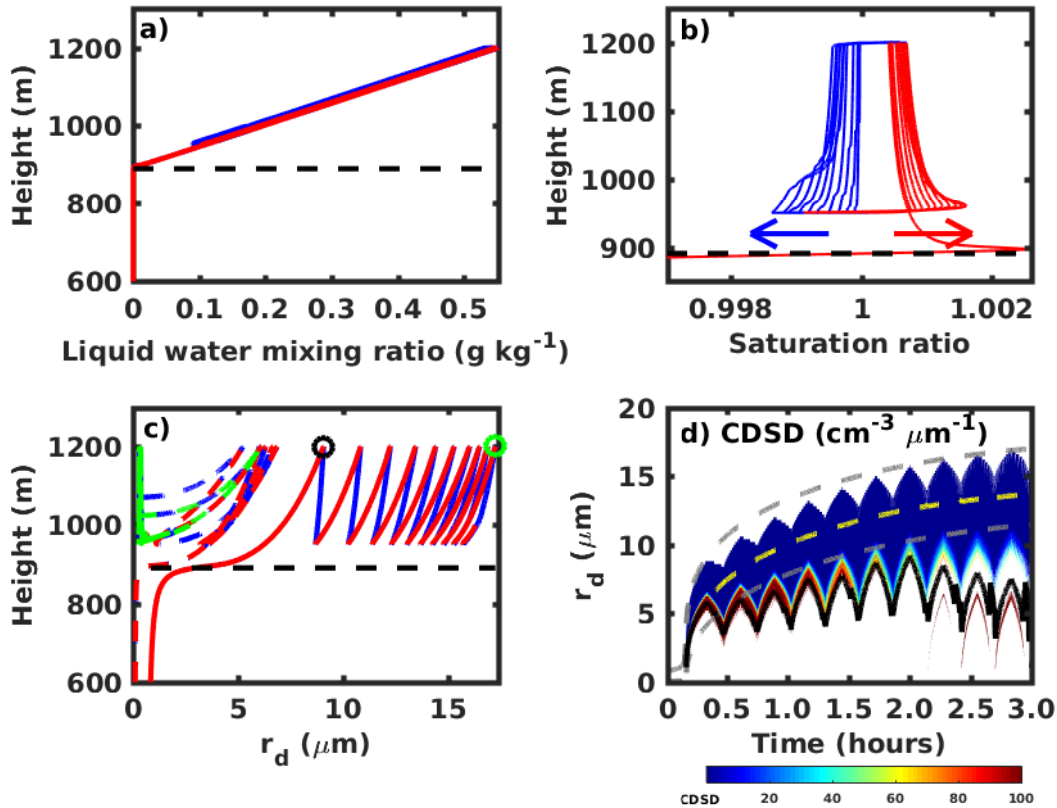

**Figure 2.** Thermodynamical and microphysical properties of an adiabatic cloud parcel with upward and downward oscillations. a) Liquid water mixing ratio changes with height. b) Cloud parcel saturation ratio changes with height. Arrows in b represent the evolution of saturation ratio profile with time. c) Radii changes of two selected cloud droplets with height. The solid line is for the largest cloud droplet that formed on a dry aerosol with radius of  $503\text{ nm}$ , and the dashed line is for droplet that formed on an aerosol of  $51\text{ nm}$ . The red and blue lines in a-c represent ascending and descending parcels, and the black dashed line indicates cloud base height. The green dashed line indicates the reactivation of that bin. The black and green circles are referred to in the text. d) Cloud droplet size distribution changes with time. The black line represents the mean cloud droplet radius change with time. The yellow dashed line is the change in mean droplet size for the ascending-only cloud parcel with a constant velocity of  $0.5\text{ m s}^{-1}$ , and the upper and lower dashed gray lines represent the largest and smallest cloud droplets in the ascending-only parcel.

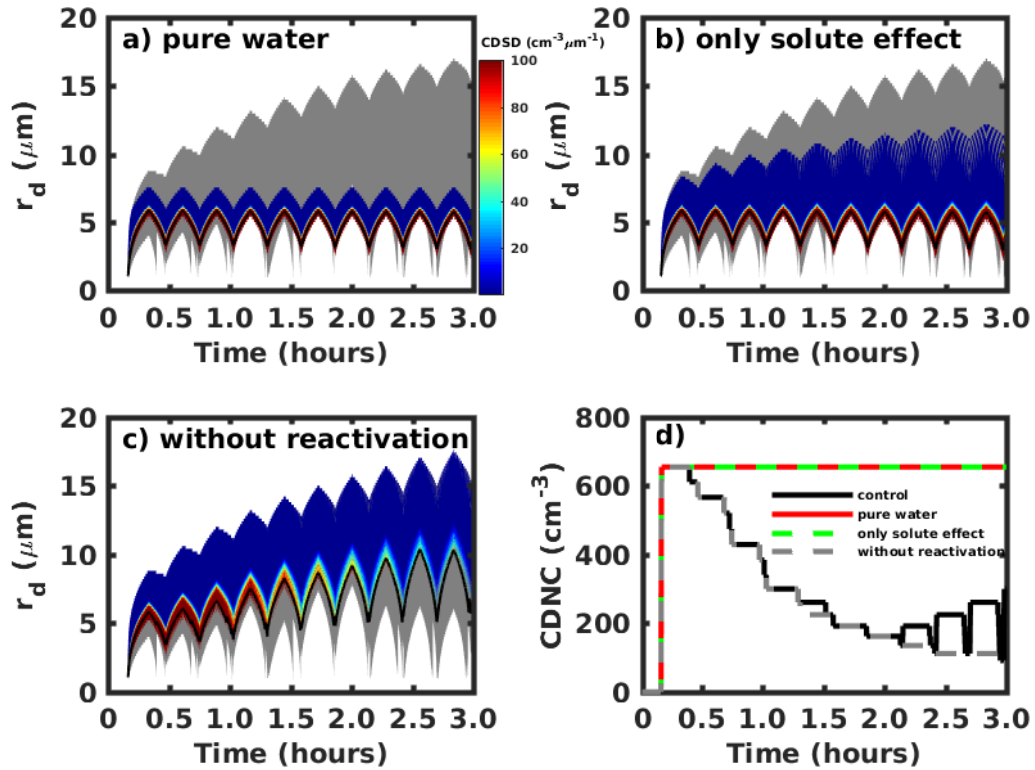

**Figure 3.** a) Cloud droplet size distribution (CDS) changes with time without solute or curvature effects. b) CDSC changes with time with the solute effect but without the curvature effect. c) CDS changes with time including both solute and curvature effects but where droplet reactivation is not considered. d) Total cloud droplet number concentration ( $n$ ) changes with time for the different cases. The gray region in a-c represents the range of the droplet size spectrum for the control case, and the black lines represent the mean cloud droplet radius change with time.



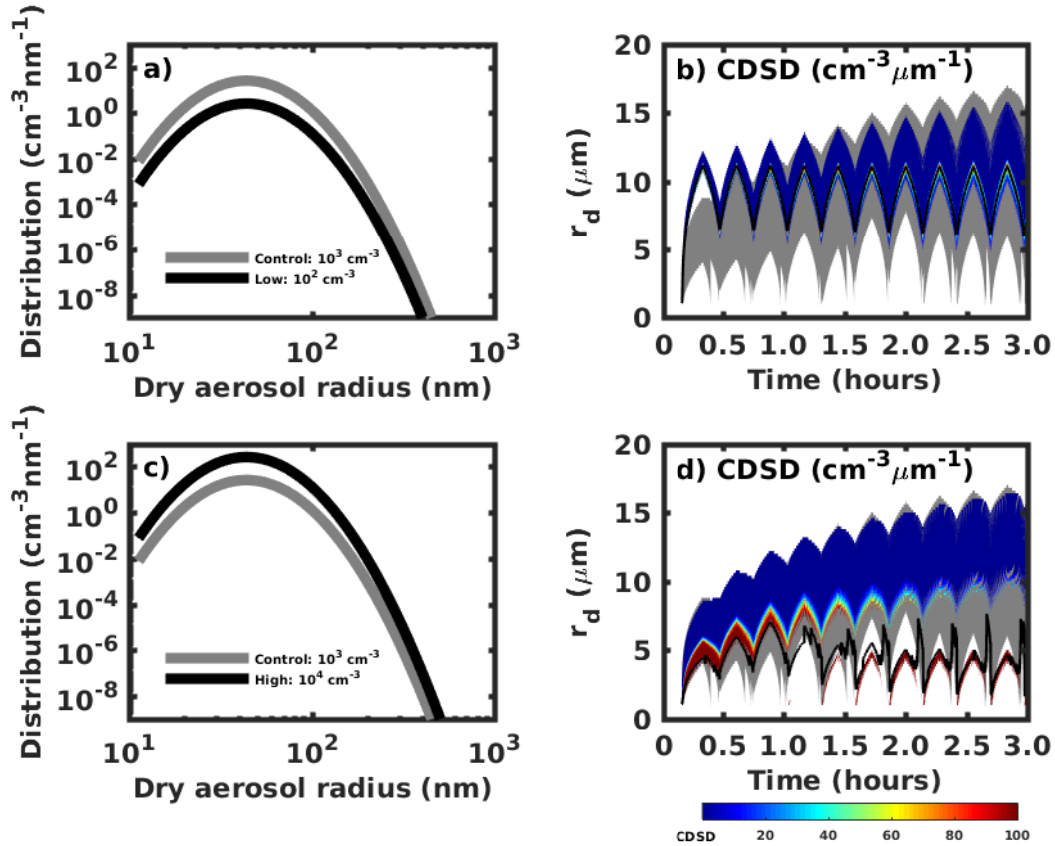

**Figure 4.** a) Aerosol size distribution for a low number concentration of  $10^2 \text{ cm}^{-3}$ . b) Cloud droplet size distribution changes with time for the low aerosol number concentration case. c) Aerosol size distribution for the high number concentration of  $10^4 \text{ cm}^{-3}$ . d) Cloud droplet size distribution changes with time for the high aerosol number concentration case. Gray lines in a and c represent the control case with a total aerosol number concentration of  $10^3 \text{ cm}^{-3}$ , and gray regions in b and d are the range of the cloud droplet size spectrum for the control case.

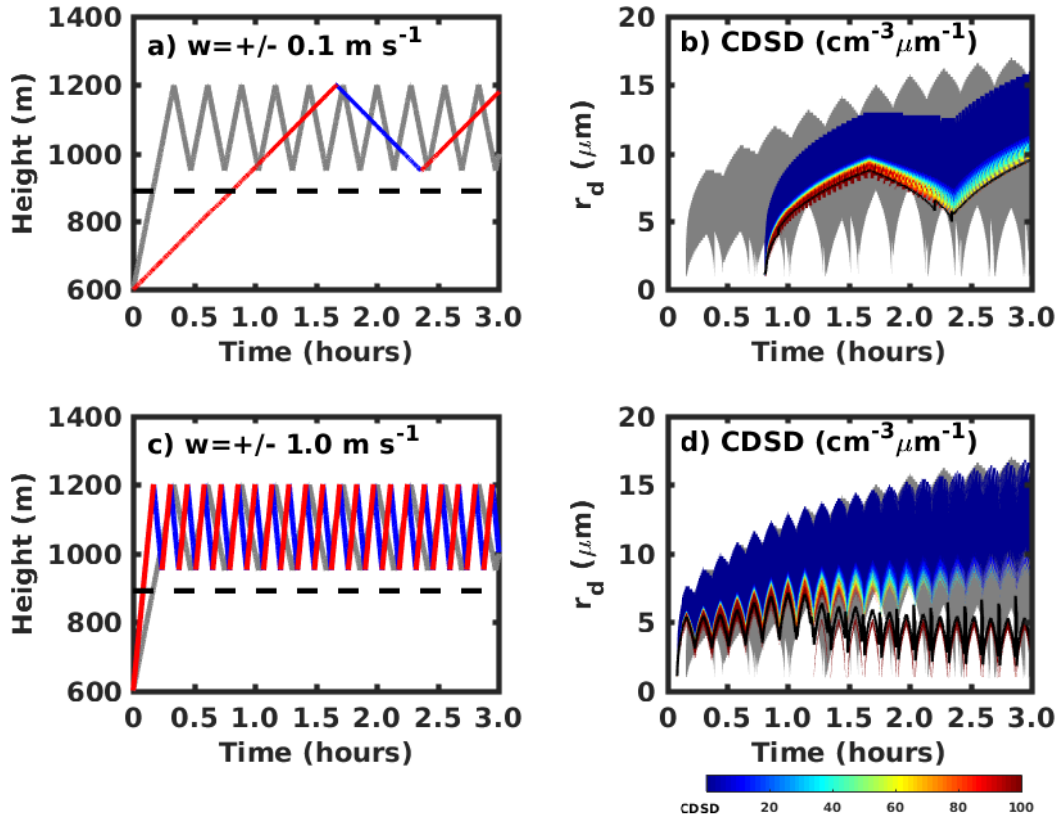

**Figure 5.** a) The height of cloud parcel changes with time for the low velocity case of  $\pm 0.1 \text{ m s}^{-1}$ . b) Cloud droplet size distribution changes with time for the low velocity case. c) The height of the cloud parcel changes with time for the velocity of  $\pm 1.0 \text{ m s}^{-1}$ . d) Cloud droplet size distribution changes with time for the high velocity case. Gray lines in a and c represent the control case with velocity of  $\pm 0.5 \text{ m s}^{-1}$ , and the gray regions in b and d are the range of cloud droplet spectrum for the control case.

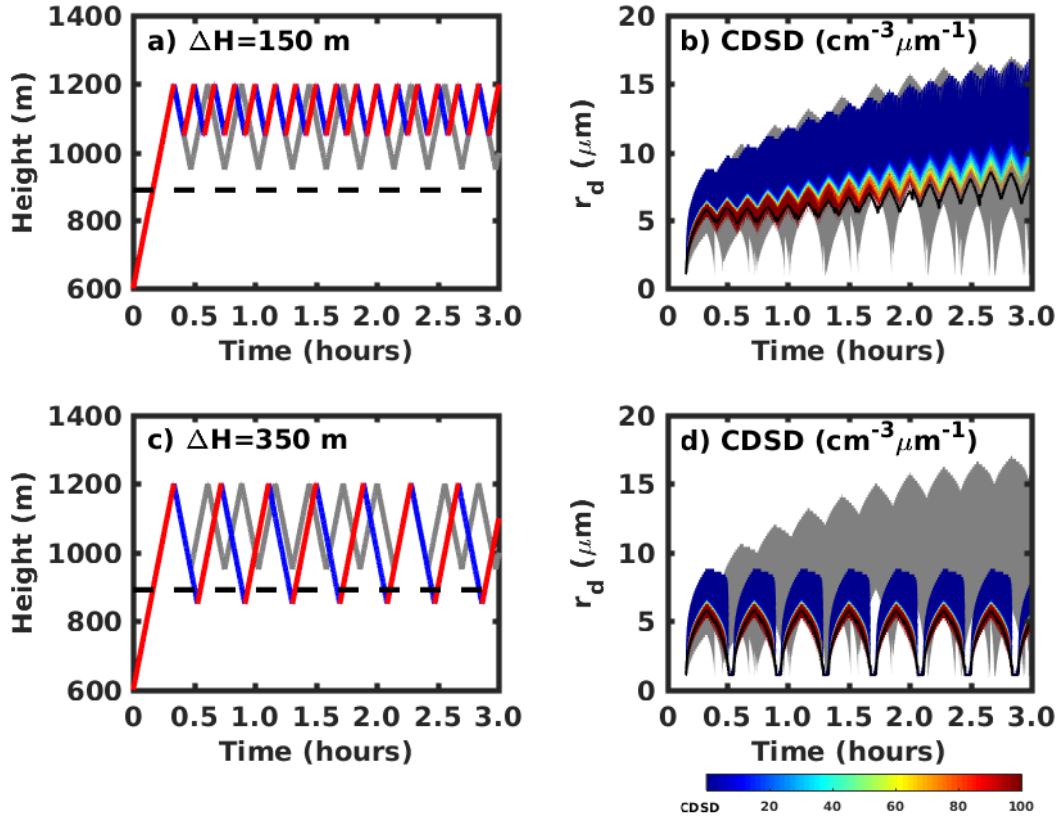

**Figure 6.** a) The height of cloud parcel changes with time for the thin eyeing **recirculation** layer of 150 *m*. b) Cloud droplet size distribution changes with time for the thin eyeing **recirculation** layer case. c) Aerosol size distribution for the thick eyeing **recirculation** layer of 350 *m*. d) Cloud droplet size distribution changes with time for the thick eyeing **recirculation** layer case. The gray lines in a and c represent the control case with eyeing **recirculation** layer of 250 *m*, and the gray regions in b and d are the range of cloud droplet size spectrum for the control case.

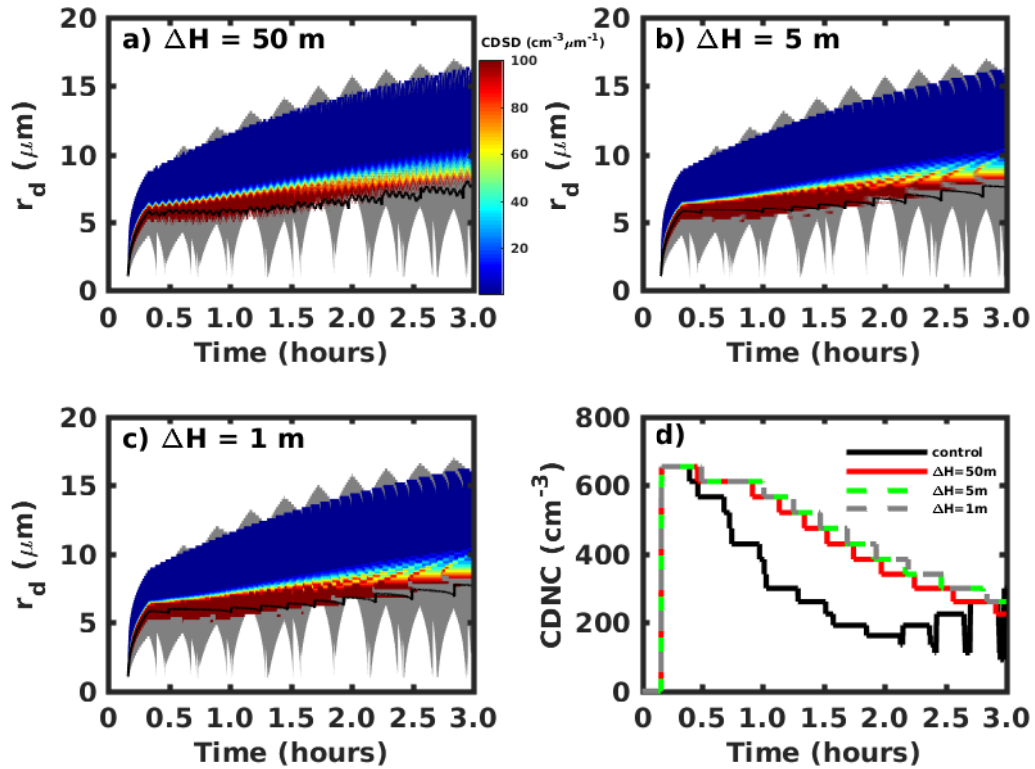

**Figure 7.** Cloud droplet size distribution (CDSD) changes with time for different thicknesses of recirculation layers: a)  $\Delta H = 50$  m, b)  $\Delta H = 5$  m, c)  $\Delta H = 1$  m. d) Total cloud droplet number concentration ( $n$ ) changes with time for the different cases. The gray region in a-c represents the range of the droplet size spectrum for the control case, and the black lines represent the mean cloud droplet radius change with time.

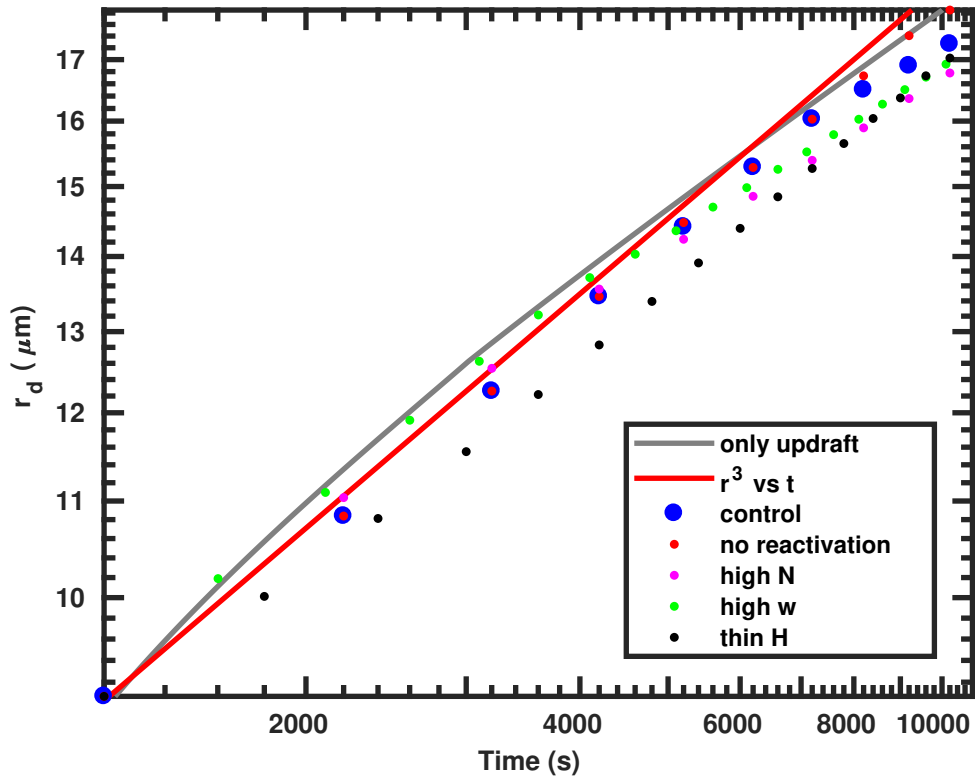

**Figure 8.** The largest cloud droplet size after each cycle is plotted for different cases discussed before: blue dots, control case; red dots, no reactivation case; pink dots, high number concentration case; green dots, high vertical velocity case; and black, thin oscillation layer case. The gray line is for the ascending-only case from Figure 4, and the red line represents the growth of a droplet with a linear mass growth rate.

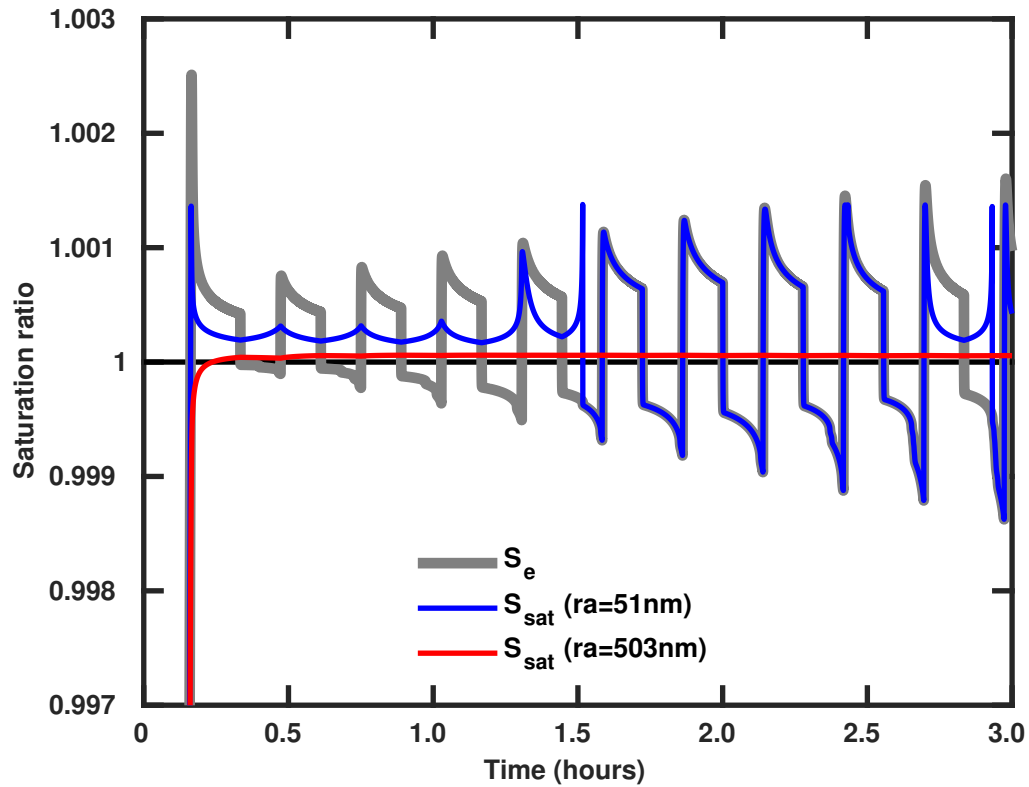

**Figure 9.** Changes of environmental saturation ratio (grey) and equilibrium saturation ratios over two droplets (red and blue) with time in an oscillating parcel. The blue line is for a droplet formed on a dry aerosol with radius of  $53\text{ nm}$  and the red line is for a droplet formed on a dry aerosol with radius of  $503\text{ nm}$ . The smaller cloud droplet (formed on a dry aerosol with radius of  $53\text{ nm}$ ) deactivates at approximately 1.5 hours and reactivates at approximately 2.5 hours.
